# Supplementary material for: Bovine glutamate dehydrogenase immobilization on magnetic nanoparticles: conformational changes and catalysis
Source: Royal Society of Chemistry journal article supplement (doi:10.1039/c5ra24637g), 2016-01-01

## Bovine Glutamate Dehydrogenase Immobilization on Magnetic Nanoparticles : conformational changes and catalysis

Caterina G. C. Marques Netto <sup>\*a</sup>, Delmárcio G. da Silva <sup>b</sup>, Sergio H. Toma <sup>b</sup>, Leandro H. Andrade<sup>c</sup>, Marcelo Nakamura <sup>b</sup>, Koiti Araki <sup>b</sup>, Henrique E.Toma <sup>b</sup>

*a- Metalloenzymes and Mimetics Laboratory, UFSCar, São Carlos-SP, Brazil*

*b- Supramolecular NanotechLab, Instituto de Química, Universidade de São Paulo, São Paulo—SP, Brazil*

*c- Laboratory of Fine Chemistry and Biocatalysis, Instituto de Química, Universidade de São Paulo, São Paulo—SP, Brazil*

*e-mail: caterina@ufscar.br*

### Support Information

|                                                                                                                                                                                                                                |   |
|--------------------------------------------------------------------------------------------------------------------------------------------------------------------------------------------------------------------------------|---|
| <b>S1-</b> Influence of the amount of MagNP-APTS added to 100 µL of a GDH solution 0.523 mg/mL (2U) and 1x10 <sup>-6</sup> mol of glutaraldehyde. ....                                                                         | 2 |
| <b>S2-</b> Influence of the amount glutaldehyde added to 100 µL of a GDH solution 0.523 mg/mL (2U) and 2mg of MagNP-APTS. ....                                                                                                 | 3 |
| <b>S3-</b> Influence of the immobilization time for MagNP-APTS/GDH using 100 µL of a GDH solution 0.523 mg/mL (2U), 2mg of MagNP-APTS and 2,5x10 <sup>-7</sup> mol of glutaraldehyde. ....                                     | 3 |
| <b>S4-</b> Influence of the amount of MagNP@SiO <sub>2</sub> -APTS added to 100 µL of a GDH solution 0.523 mg/mL (2U) and 1x10 <sup>-6</sup> mol of glutaraldehyde. ....                                                       | 4 |
| <b>S5-</b> Influence of the amount of glutaraldehyde added to 100 µL of a GDH solution 0.523 mg/mL (2U) and 1,2 mg of MagNP@SiO <sub>2</sub> -APTS. ....                                                                       | 4 |
| <b>S6-</b> Influence of the immobilization time for MagNP@SiO <sub>2</sub> -APTS/GDH using 100 µL of a GDH solution 0.523 mg/mL (2U), 1,2 mg of MagNP@SiO <sub>2</sub> -APTS and 1x10 <sup>-6</sup> mol of glutaraldehyde. ... | 5 |
| <b>S7-</b> Influence of amount of glyoxyl-agarose used for 100 µL of a GDH solution 0.523 mg/mL (2U) and 2mg of MagNP-APTS. ....                                                                                               | 6 |
| <b>S8-</b> Influence of the amount of MagNP-APTS used for the immobilization of 100 µL of a GDH solution 0.523 mg/mL (2U) using 50 µL of glyoxyl-agarose suspension (150 mg/mL).....                                           | 6 |
| <b>S9-</b> Influence of the immobilization time using 100 µL of a GDH solution 0.523 mg/mL (2U), 100 µL of glyoxyl-agarose suspension (15 0mg/mL) and 2mg of MagNP-APTS. ....                                                  | 7 |
| <b>S10-</b> Influence of amount of MagNP@CMC suspension (200 mg/mL ) used for the immobilization of 100 µL of a GDH solution 0.523 mg/mL (2U). ....                                                                            | 7 |
| <b>S11-</b> Influence of the amount of GDH used for immobilization when employing 100 µL of a MagNP@CMC suspension (200 mg/mL). ....                                                                                           | 8 |

**S12-** Influence of immobilization time used for the immobilization of 100  $\mu$ L of a GDH solution 0.523 mg/mL (2U) in 100 mL of a MagNP@CMC suspension (200 mg/mL).....8

**S13-** Most Probable States ensemble comparison between free GDH and MagNP-APTS/GDH...9

**S14-** Most Probable States ensemble comparison between free GDH and MagNP-APTS/Glyoxyl-Agarose/GDH. ....9

**S15-** Most Probable States ensemble comparison between free GDH and MagNP@CMC/GDH. ....10

**S1-** Influence of the amount of MagNP-APTS added to 100  $\mu$ L of a GDH solution 0.523 mg/mL (2U) and  $1 \times 10^{-6}$  mol of glutaraldehyde.

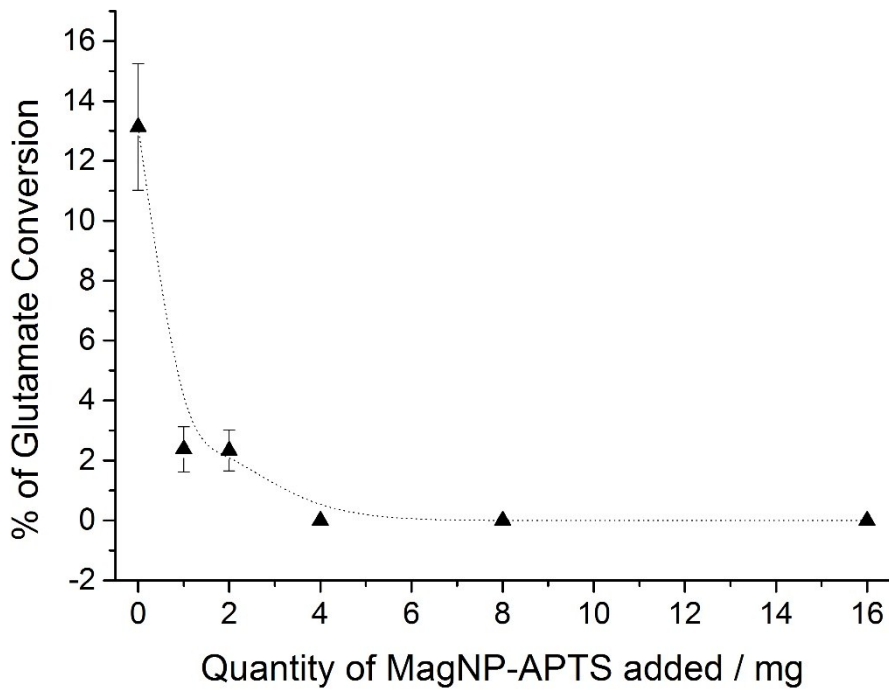

**S2-** Influence of the amount glutaraldehyde added to 100  $\mu\text{L}$  of a GDH solution 0.523 mg/mL (2U) and 2mg of MagNP-APTS.

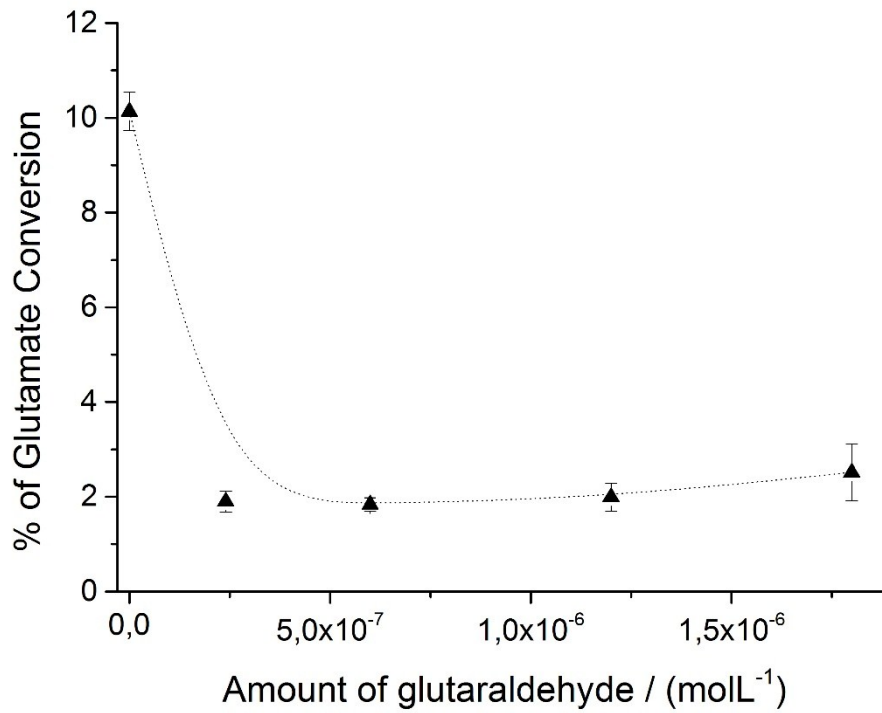

**S3-** Influence of the immobilization time for MagNP-APTS/GDH using 100  $\mu\text{L}$  of a GDH solution 0.523 mg/mL (2U), 2mg of MagNP-APTS and 2,5x10<sup>-7</sup> mol of glutaraldehyde.

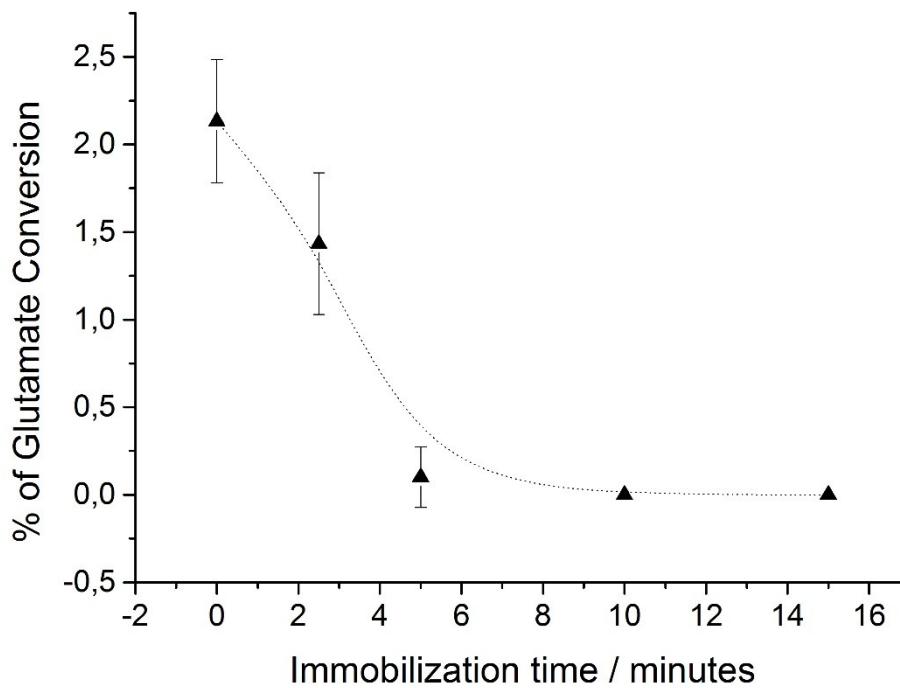

**S4-** Influence of the amount of MagNP@SiO<sub>2</sub>-APTS added to 100 μL of a GDH solution 0.523 mg/mL (2U) and 1x10<sup>-6</sup> mol of glutaraldehyde.

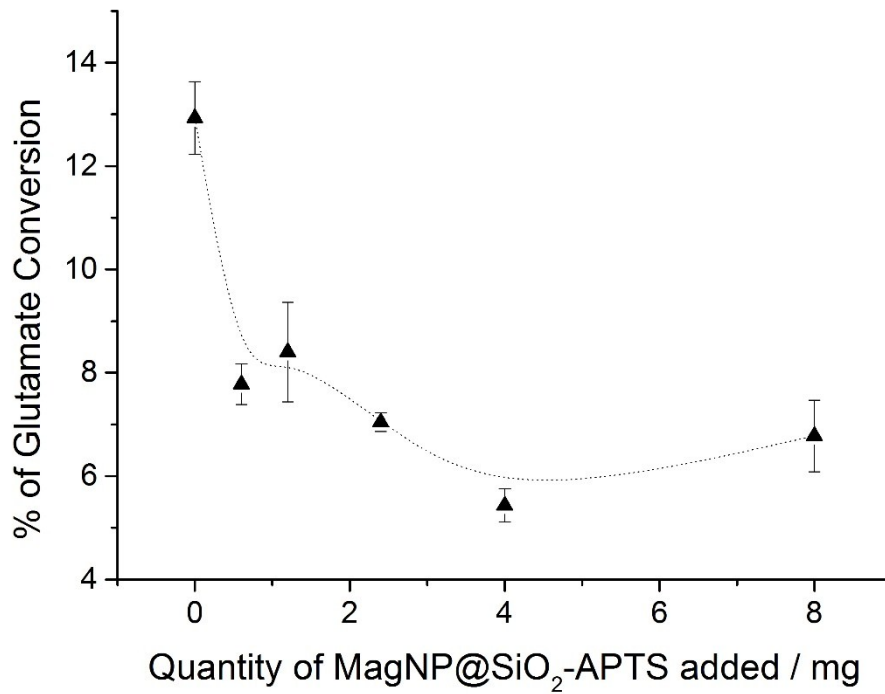

**S5-** Influence of the amount of glutaraldehyde added to 100 μL of a GDH solution 0.523 mg/mL (2U) and 1,2 mg of MagNP@SiO<sub>2</sub>-APTS.

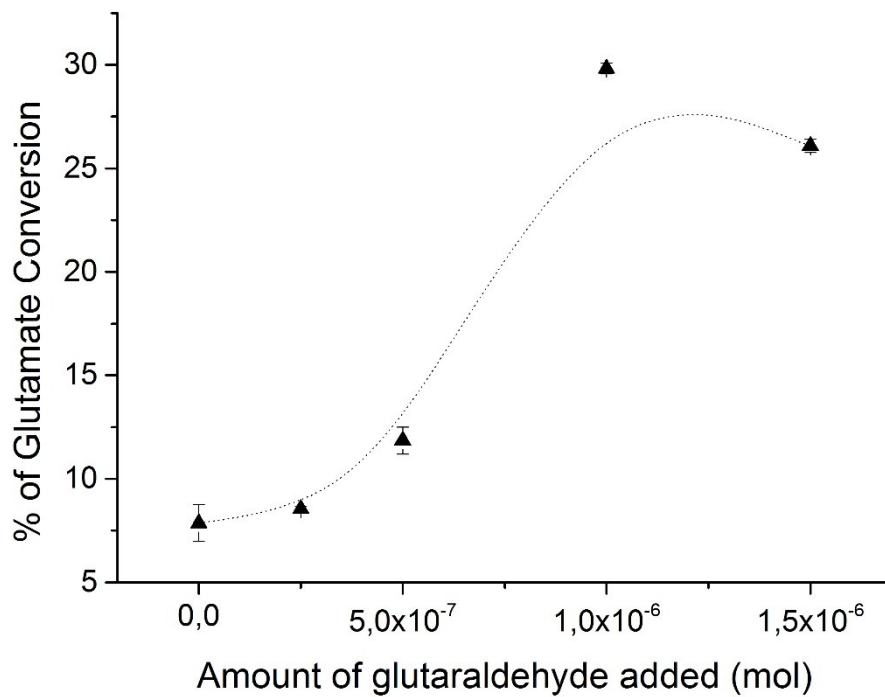

**S6-** Influence of the immobilization time for MagNP@SiO<sub>2</sub>-APTS/GDH using 100 μL of a GDH solution 0.523 mg/mL (2U), 1,2 mg of MagNP@SiO<sub>2</sub>-APTS and 1x10<sup>-6</sup> mol of glutaraldehyde.

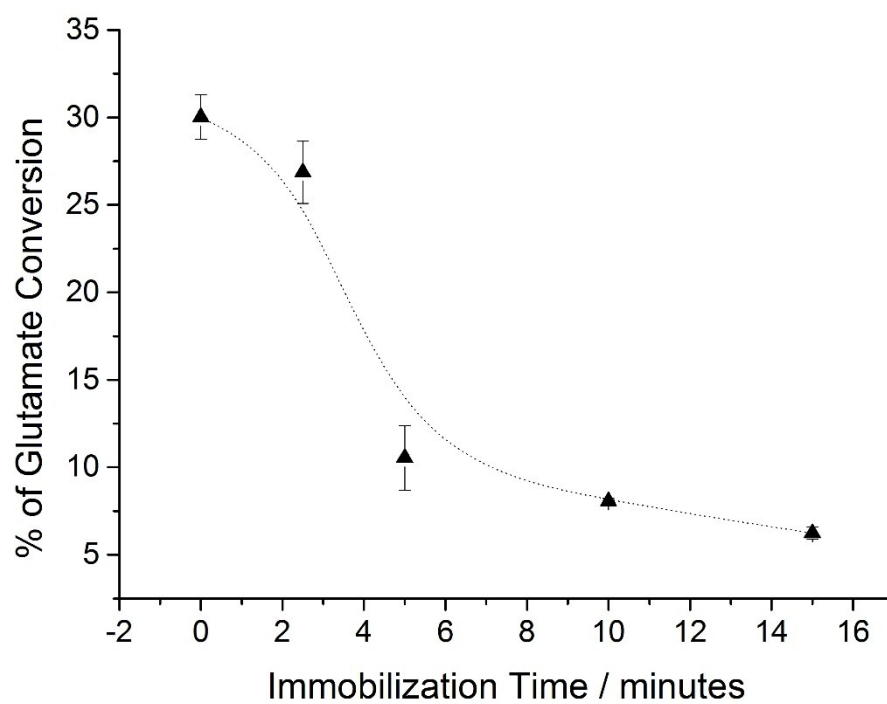

**S7-** Influence of amount of glyoxyl-agarose used for 100  $\mu$ L of a GDH solution 0.523 mg/mL (2U) and 2mg of MagNP-APTS.

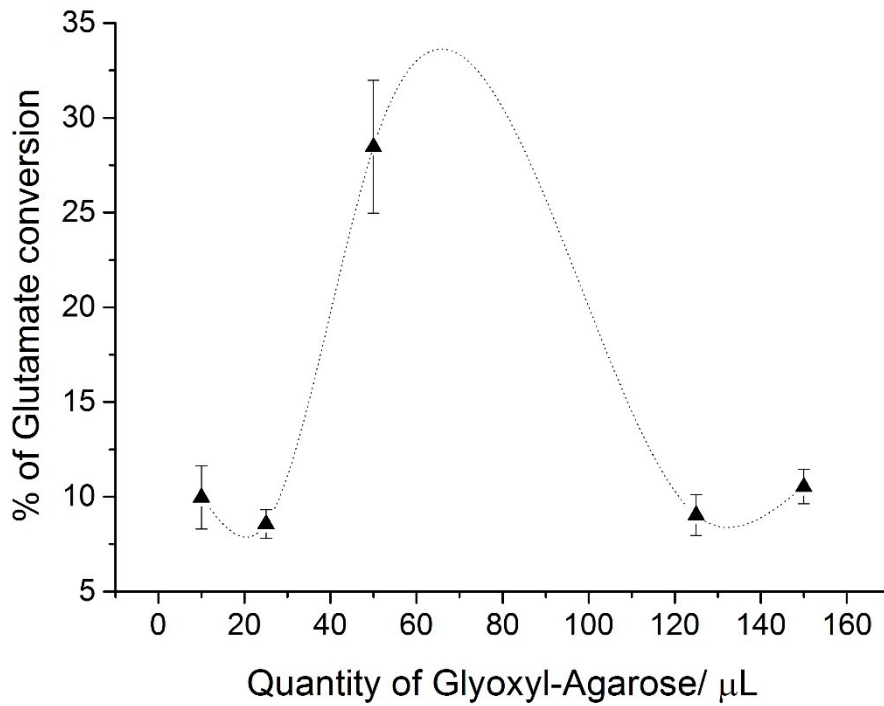

**S8-** Influence of the amount of MagNP-APTS used for the immobilization of 100  $\mu$ L of a GDH solution 0.523 mg/mL (2U) using 50  $\mu$ L of glyoxyl-agarose suspension (150 mg/mL).

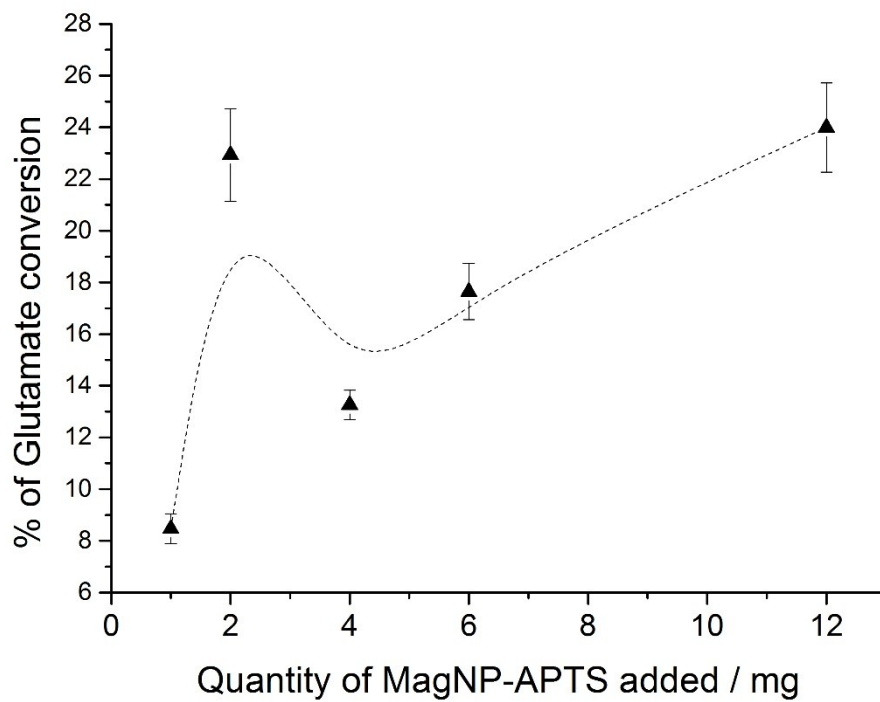

**S9-** Influence of the immobilization time using 100  $\mu\text{L}$  of a GDH solution 0.523 mg/mL (2U), 100  $\mu\text{L}$  of glyoxyl-agarose suspension (15 0mg/mL) and 2mg of MagNP-APTS.

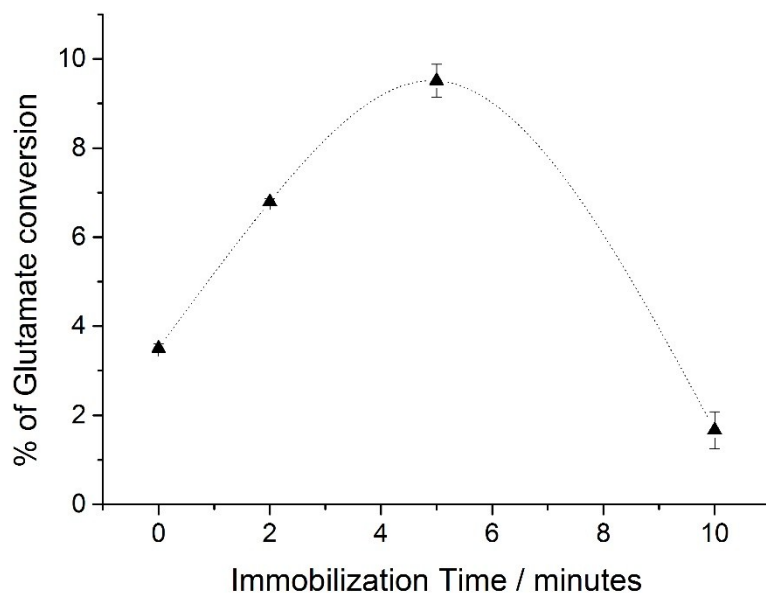

**S10-** Influence of amount of MagNP@CMC suspension (200 mg/mL ) used for the immobilization of 100  $\mu\text{L}$  of a GDH solution 0.523 mg/mL (2U).

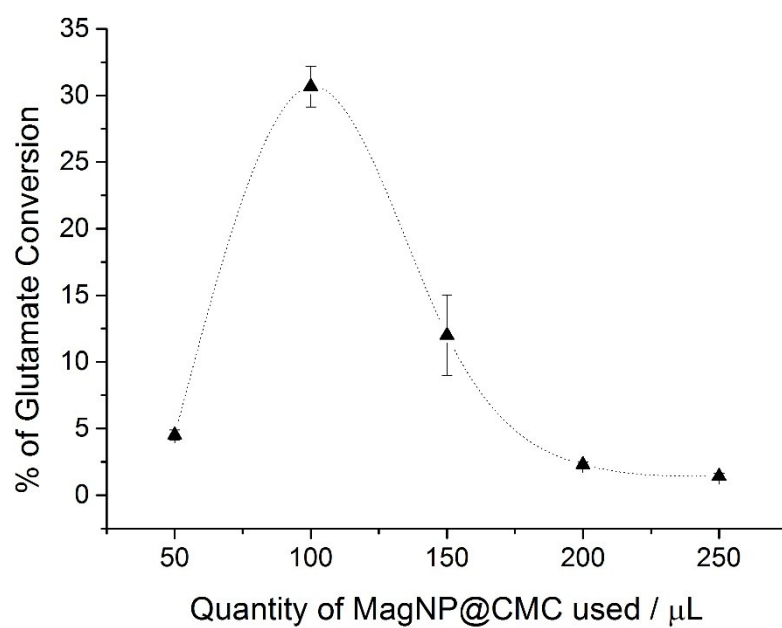

**S11-** Influence of the amount of GDH used for immobilization when employing 100  $\mu\text{L}$  of a MagNP@CMC suspension (200 mg/mL).

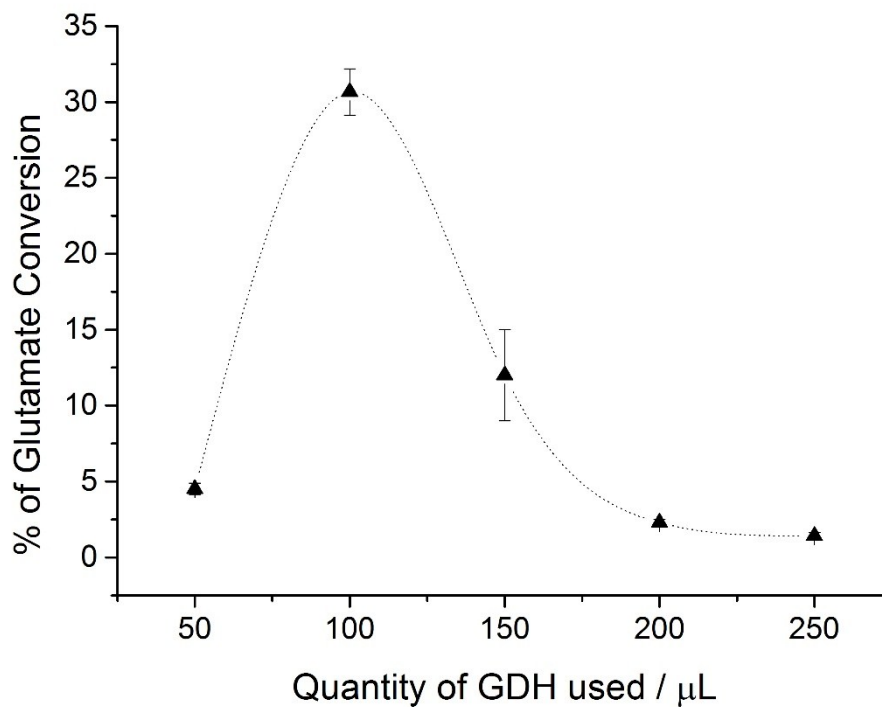

**S12-** Influence of immobilization time used for the immobilization of 100  $\mu\text{L}$  of a GDH solution 0.523 mg/mL (2U) in 100 mL of a MagNP@CMC suspension (200 mg/mL).

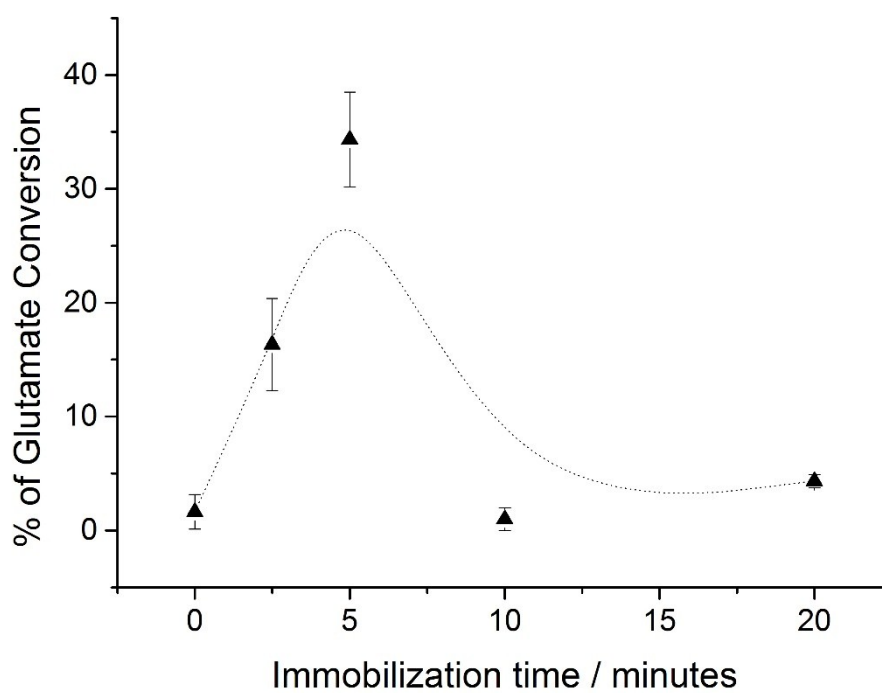



**S13-** Most Probable States ensemble comparison between free GDH and MagNP-APTS/GDH.

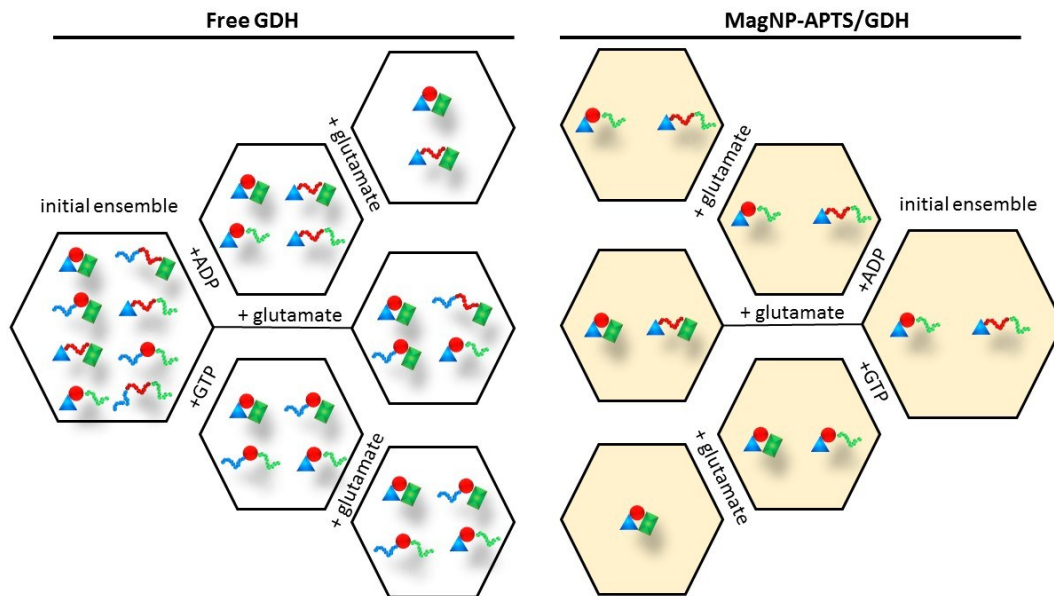

**S14-** Most Probable States ensemble comparison between free GDH and MagNP-APTS/Glyoxyl-Agarose/GDH.

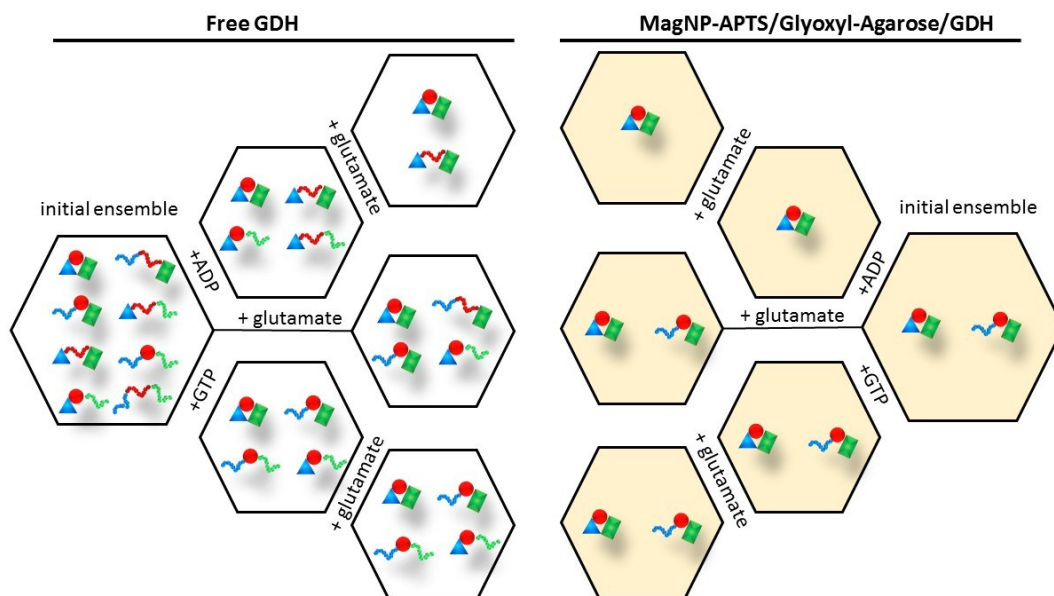

S15- Most Probable States ensemble comparison between free GDH and MagNP@CMC/GDH.

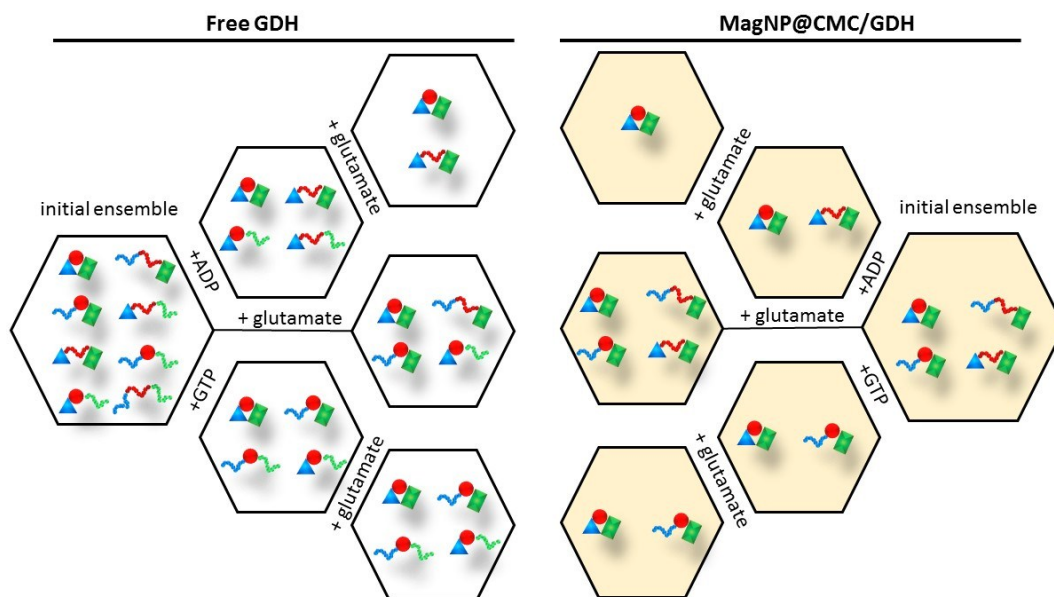

Supplement: c5ra24637g1.pdf [file c5ra24637g1.pdf]
